# Supplementary material
Source: HighWire-hosted journal article supplement (https://tsaco.bmj.com/content/2/1/e000128)
Supplement: inline-supplementary-material-1 [file inline-supplementary-material-1.docx]

Figure 1 – Definition of the ASA Physical Status Classification

| **Classification** | **Definition** | **Example** |
| --- | --- | --- |
| **ASA I** | A normal healthy patient | Healthy non-smoker |
| **ASA II** | A patient with mild systemic disease | Mild disease without significant functional limitation (ex. current smoker, well-controlled diabetes or hypertension) |
| **ASA III** | A patient with severe systemic disease | Disease with significant functional limitation (ex. poorly controlled diabetes or hypertension, COPD, alcohol or drug abuse, history > 3 months of MI, CVA or TIA) |
| **ASA IV** | A patient with severe systemic disease that is a constant threat to life | (ex. Recent MI, CVA or TIA within 3 months, ongoing valvular dysfunction or cardiac ischemia, severe reduction of ejection fraction) |

Adapted from the American Society of Anesthesiologists Physical Status Classification resource, 2014 edition [23]

COPD = Chronic obstructive pulmonary disease

MI = Myocardial infarction

CVA = Cerebrovascular accident

TIA = Transient ischemic attack
