# Supplementary material
Source: HighWire-hosted journal article supplement (https://tsaco.bmj.com/content/2/1/e000128)
Supplement: inline-supplementary-material-2 [file inline-supplementary-material-2.docx]

| **Variable** | **30 Day Readmission** | | | **3 Month Readmission** | | | **6 Month Readmission** | | |
| --- | --- | --- | --- | --- | --- | --- | --- | --- | --- |
| **+READM**  **n = 307 (6.5)** | **–READM**  **n = 4425 (93.5)** | **P-Value** | **+READM**  **n = 453 (9.6)** | **–READM**  **n = 4279 (90.4)** | **P-Value** | **+READM**  **n = 556 (11.8)** | **–READM**  **n = 4176 (88.2)** | **P-Value** |
| Age |  |  | P < 0.001 |  |  | P < 0.001 |  |  | P < 0.001 |
| 18 years – 39 years | 64 (21.0) | 1190 (27.3) |  | 78 (17.3) | 1176 (27.9) |  | 92 (16.6) | 1162 (28.2) |  |
| 40 years – 59 years | 69 (22.6) | 1277 (29.3) |  | 105 (23.3) | 1241 (29.4) |  | 129 (23.3) | 1217 (29.) |  |
| 60 years – 79 years | 94 (30.8) | 1130 (25.9) |  | 137 (30.4) | 1087 (25.6) |  | 169 (30.5) | 1055 (25.6) |  |
| 80 years or older | 78 (25.6) | 770 (17.6) |  | 131 (29.1) | 717 (17.0) |  | 164 (29.6) | 684 (16.6) |  |
| Sex |  |  | P = 0.40 |  |  | P = 0.03 |  |  | P = 0.07 |
| Male | 206 (66.9) | 3061 (69.2) |  | 161 (35.5) | 1305 (30.5) |  | 191 (34.3) | 1275 (30.5) |  |
| Female | 102 (33.1) | 1364 (30.8) |  | 293 (64.5) | 2974 (69.5) |  | 366 (65.7) | 2901 (69.5) |  |
| Mechanism |  |  | P = 0.22 |  |  | P = 0.03 |  |  | P = 0.003 |
| Penetrating | 15 (4.9) | 295 (6.7) |  | 19 (4.2) | 291 (6.8) |  | 20 (3.6) | 290 (6.9) |  |
| Blunt | 293 (95.1) | 4130 (93.3) |  | 435 (95.8) | 3988 (93.2) |  | 537 (96.4) | 3886 (93.1) |  |
| Injury Severity Score |  |  | P = 0.15 |  |  | P = 0.10 |  |  | P = 0.01 |
| ISS < 16 | 57 (18.5) | 1024 (23.1) |  | 89 (19.6) | 992 (23.2) |  | 104 (18.7) | 977 (23.4) |  |
| ISS 16 – 24 | 137 (44.5) | 1915 (43.3) |  | 194 (42.7) | 1858 (43.4) |  | 237 (42.6) | 1815 (43.5) |  |
| ISS > 24 | 114 (37.0) | 1486 (33.6) |  | 171 (37.7) | 1429 (33.4) |  | 216 (38.8) | 1384 (33.1) |  |
| Need for Surgery |  |  | P = 0.47 |  |  | P = 0.34 |  |  | P = 0.18 |
| None | 175 (56.8) | 2485 (55.2) |  | 257 (56.7) | 2403 (56.2) |  | 319 (57.3) | 2341 (56.1) |  |
| 1 Surgery | 97 (31.5) | 1504 (34.0) |  | 144 (31.7) | 1457 (34.1) |  | 173 (31.1) | 1428 (34.2) |  |
| > 1 Surgeries | 36 (11.7) | 436 (9.9) |  | 53 (11.7) | 319 (9.8) |  | 65 (11.7) | 407 (9.8) |  |
| Length of Stay |  |  | P = 0.77 |  |  | P = 0.28 |  |  | P = 0.003 |
| ≤ 7 days | 131 (42.5) | 1892 (42.8) |  | 178 (39.2) | 1845 (43.1) |  | 205 (36.8) | 1818 (43.5) |  |
| 8 – 28 days | 122 (39.6) | 1679 (37.9) |  | 183 (40.3) | 1618 (37.8) |  | 221 (39.7) | 1580 (37.8) |  |
| > 28 days | 55 (17.9) | 854 (19.3) |  | 93 (20.5) | 816 (19.1) |  | 131 (23.5) | 778 (18.6) |  |
| Discharge Disposition |  |  | P < 0.001 |  |  | P < 0.001 |  |  | P < 0.001 |
| Home | 50.33% | 51.95% |  | 211 (46.7) | 2238 (52.4) |  | 247 (44.5) | 2202 (52.8) |  |
| Home with Supportive Care | 31.05% | 22.45% |  | 149 (33.0) | 938 (22.0) |  | 188 (33.9) | 899 (21.6) |  |
| Medical Care Facility | 18.63% | 25.60% |  | 92 (20.4) | 1096 (25.7) |  | 120 (21.6) | 1068 (25.6) |  |
| Pre-Injury ASA Score |  |  | P < 0.001 |  |  | P = 0.001 |  |  | P < 0.001 |
| 1 | 44 (14.3) | 1377 (32.8) |  | 74 (16.4) | 1347 (33.2) |  | 95 (17.3) | 1326 (33.5) |  |
| 2 | 70 (22.7) | 977 (23.2) |  | 99 (22.0) | 948 (23.3) |  | 125 (22.7) | 922 (23.3) |  |
| 3 | 133 (43.2) | 1512 (36.0) |  | 201 (44.7) | 1444 (35.6) |  | 250 (45.5) | 1395 (35.2) |  |
| 4 | 61 (19.8) | 338 (8.0) |  | 76 (16.9) | 323 (8.0 |  | 80 (14.5) | 319 (8.1) |  |
| Median (IQR) Time to Readmission 26.2 (8.4, 74.0) Days | | | | | | | | | |

Table 1 – Characteristics of Patients with and without Readmission

Values represent n (%) unless otherwise indicated
