# Supplementary material
Source: HighWire-hosted journal article supplement (https://tsaco.bmj.com/content/2/1/e000128)
Supplement: inline-supplementary-material-4 [file inline-supplementary-material-4.docx]

| **Variable** | **30 Day Readmission** | | **3 Month Readmission** | | **6 Month Readmission** | |
| --- | --- | --- | --- | --- | --- | --- |
| Pre-Injury ASA Score | Odds Ratio | P-Value | Odds Ratio | P-Value | Odds Ratio | P-Value |
| 1 | REF | - | REF | - | REF | - |
| 2 | 2.81 (1.88 – 4.22) | P < 0.0001 | 1.91 (1.38 – 2.64) | P < 0.0001 | 1.75 (1.31 – 2.34) | P = 0.0001 |
| 3 | 3.59 (2.43 – 5.32) | P < 0.0001 | 2.35 (1.73 – 3.21) | P < 0.0001 | 2.05 (1.55 – 2.71) | P < 0.0001 |
| 4 | 7.52 (4.72 – 11.99) | P < 0.0001 | 3.72 (2.53 – 5.48) | P < 0.0001 | 2.61 (1.82 – 3.75) | P < 0.0001 |
| Remaining Variables Included | Age  18 – 39 years  40 – 59 years  60 – 79 years  80 years or older  Sex  Male  Female  Mechanism  Penetrating  Blunt  Injury Severity Score  ISS < 16  ISS 16 – 24  ISS > 24  Length of Stay  ≤ 7 days  8 – 28 days  > 28 days  Need for Surgery  None  1 Surgery  > 1 Surgeries  Discharge Disposition  Home  Home with Supports  Medical Care Facility | REF  NS  NS  NS  NS  REF  NS  REF  REF  NS  NS  REF  NS  NS  REF  NS  P < 0.05  REF  P < 0.05  P < 0.05 (P) | Age  18 – 39 years  40 – 59 years  60 – 79 years  80 years or older  Sex  Male  Female  Mechanism  Penetrating  Blunt  Injury Severity Score  ISS < 16  ISS 16 – 24  ISS > 24  Length of Stay  ≤ 7 days  8 – 28 days  > 28 days  Need for Surgery  None  1 Surgery  > 1 Surgeries  Discharge Disposition  Home  Home with Supports  Medical Care Facility | REF  NS  NS  P < 0.05  NS  REF  NS  REF  REF  NS  NS  REF  NS  NS  REF  NS  P < 0.05  REF  P < 0.05  P < 0.05 (P) | Age  18 – 39 years  40 – 59 years  60 – 79 years  80 years or older  Sex  Male  Female  Mechanism  Penetrating  Blunt  Injury Severity Score  ISS < 16  ISS 16 – 24  ISS > 24  Length of Stay  ≤ 7 days  8 – 28 days  > 28 days  Need for Surgery  None  1 Surgery  > 1 Surgeries  Discharge Disposition  Home  Home with Supports  Medical Care Facility | REF  NS  P < 0.05  P < 0.05  NS  REF  NS  REF  REF  NS  NS  REF  NS  NS  REF  NS  NS  REF  P < 0.05  P < 0.05 (P) |

Table 3 – Results of Multivariate Logistic Regression

Odds Ratio is presented as (OR, 95% CI), REF = Reference Level, (P) = Variable is protective against readmission
