# Supplementary material
Source: HighWire-hosted journal article supplement (https://tsaco.bmj.com/content/2/1/e000128)
Supplement: inline-supplementary-material-5 [file inline-supplementary-material-5.docx]

Table 4 – Reasons for Readmission

| **Reason for Readmission** | **30 Day Readmission**  **n = 307** | **3 Month Readmission**  **n = 453** | **6 Month Readmission**  **n = 556** |
| --- | --- | --- | --- |
| Injury – Related |  |  |  |
| Wound Complications | 23 (7.5) | 29 (6.4) | 37 (6.3) |
| Uncontrolled Pain | 10 (3.3) | 11 (2.4) | 11 (2.0) |
| Infection (excl. wound & pneumonia) | 12 (3.9) | 18 (4.0) | 22 (4.0) |
| Respiratory (incl. pneumonia) | 35 (11.4) | 41 (9.1) | 41 (7.4) |
| DVT/PE | 9 (2.9) | 10 (2.2) | 10 (1.8) |
| Neurologic | 83 (27.0) | 108 (23.8) | 116 (20.9) |
| Psychiatric | 2 (0.7) | 4 (0.9) | 8 (1.4) |
| Repeat Injury | 3 (1.0) | 15 (3.3) | 30 (5.4) |
| Other (related to injury) | 63 (20.5) | 76 (16.8) | 83 (14.9) |
| Other Medical (not related to injury) | 67 (21.8) | 141 (31.1) | 200 (36.0) |

Values represent n (%) unless otherwise indicated
